# Supplementary material
Source: HighWire-hosted journal article supplement (doi:10.1101/rna.033100.112)
Supplement: SFig1.docx [file SFig1.docx]

**
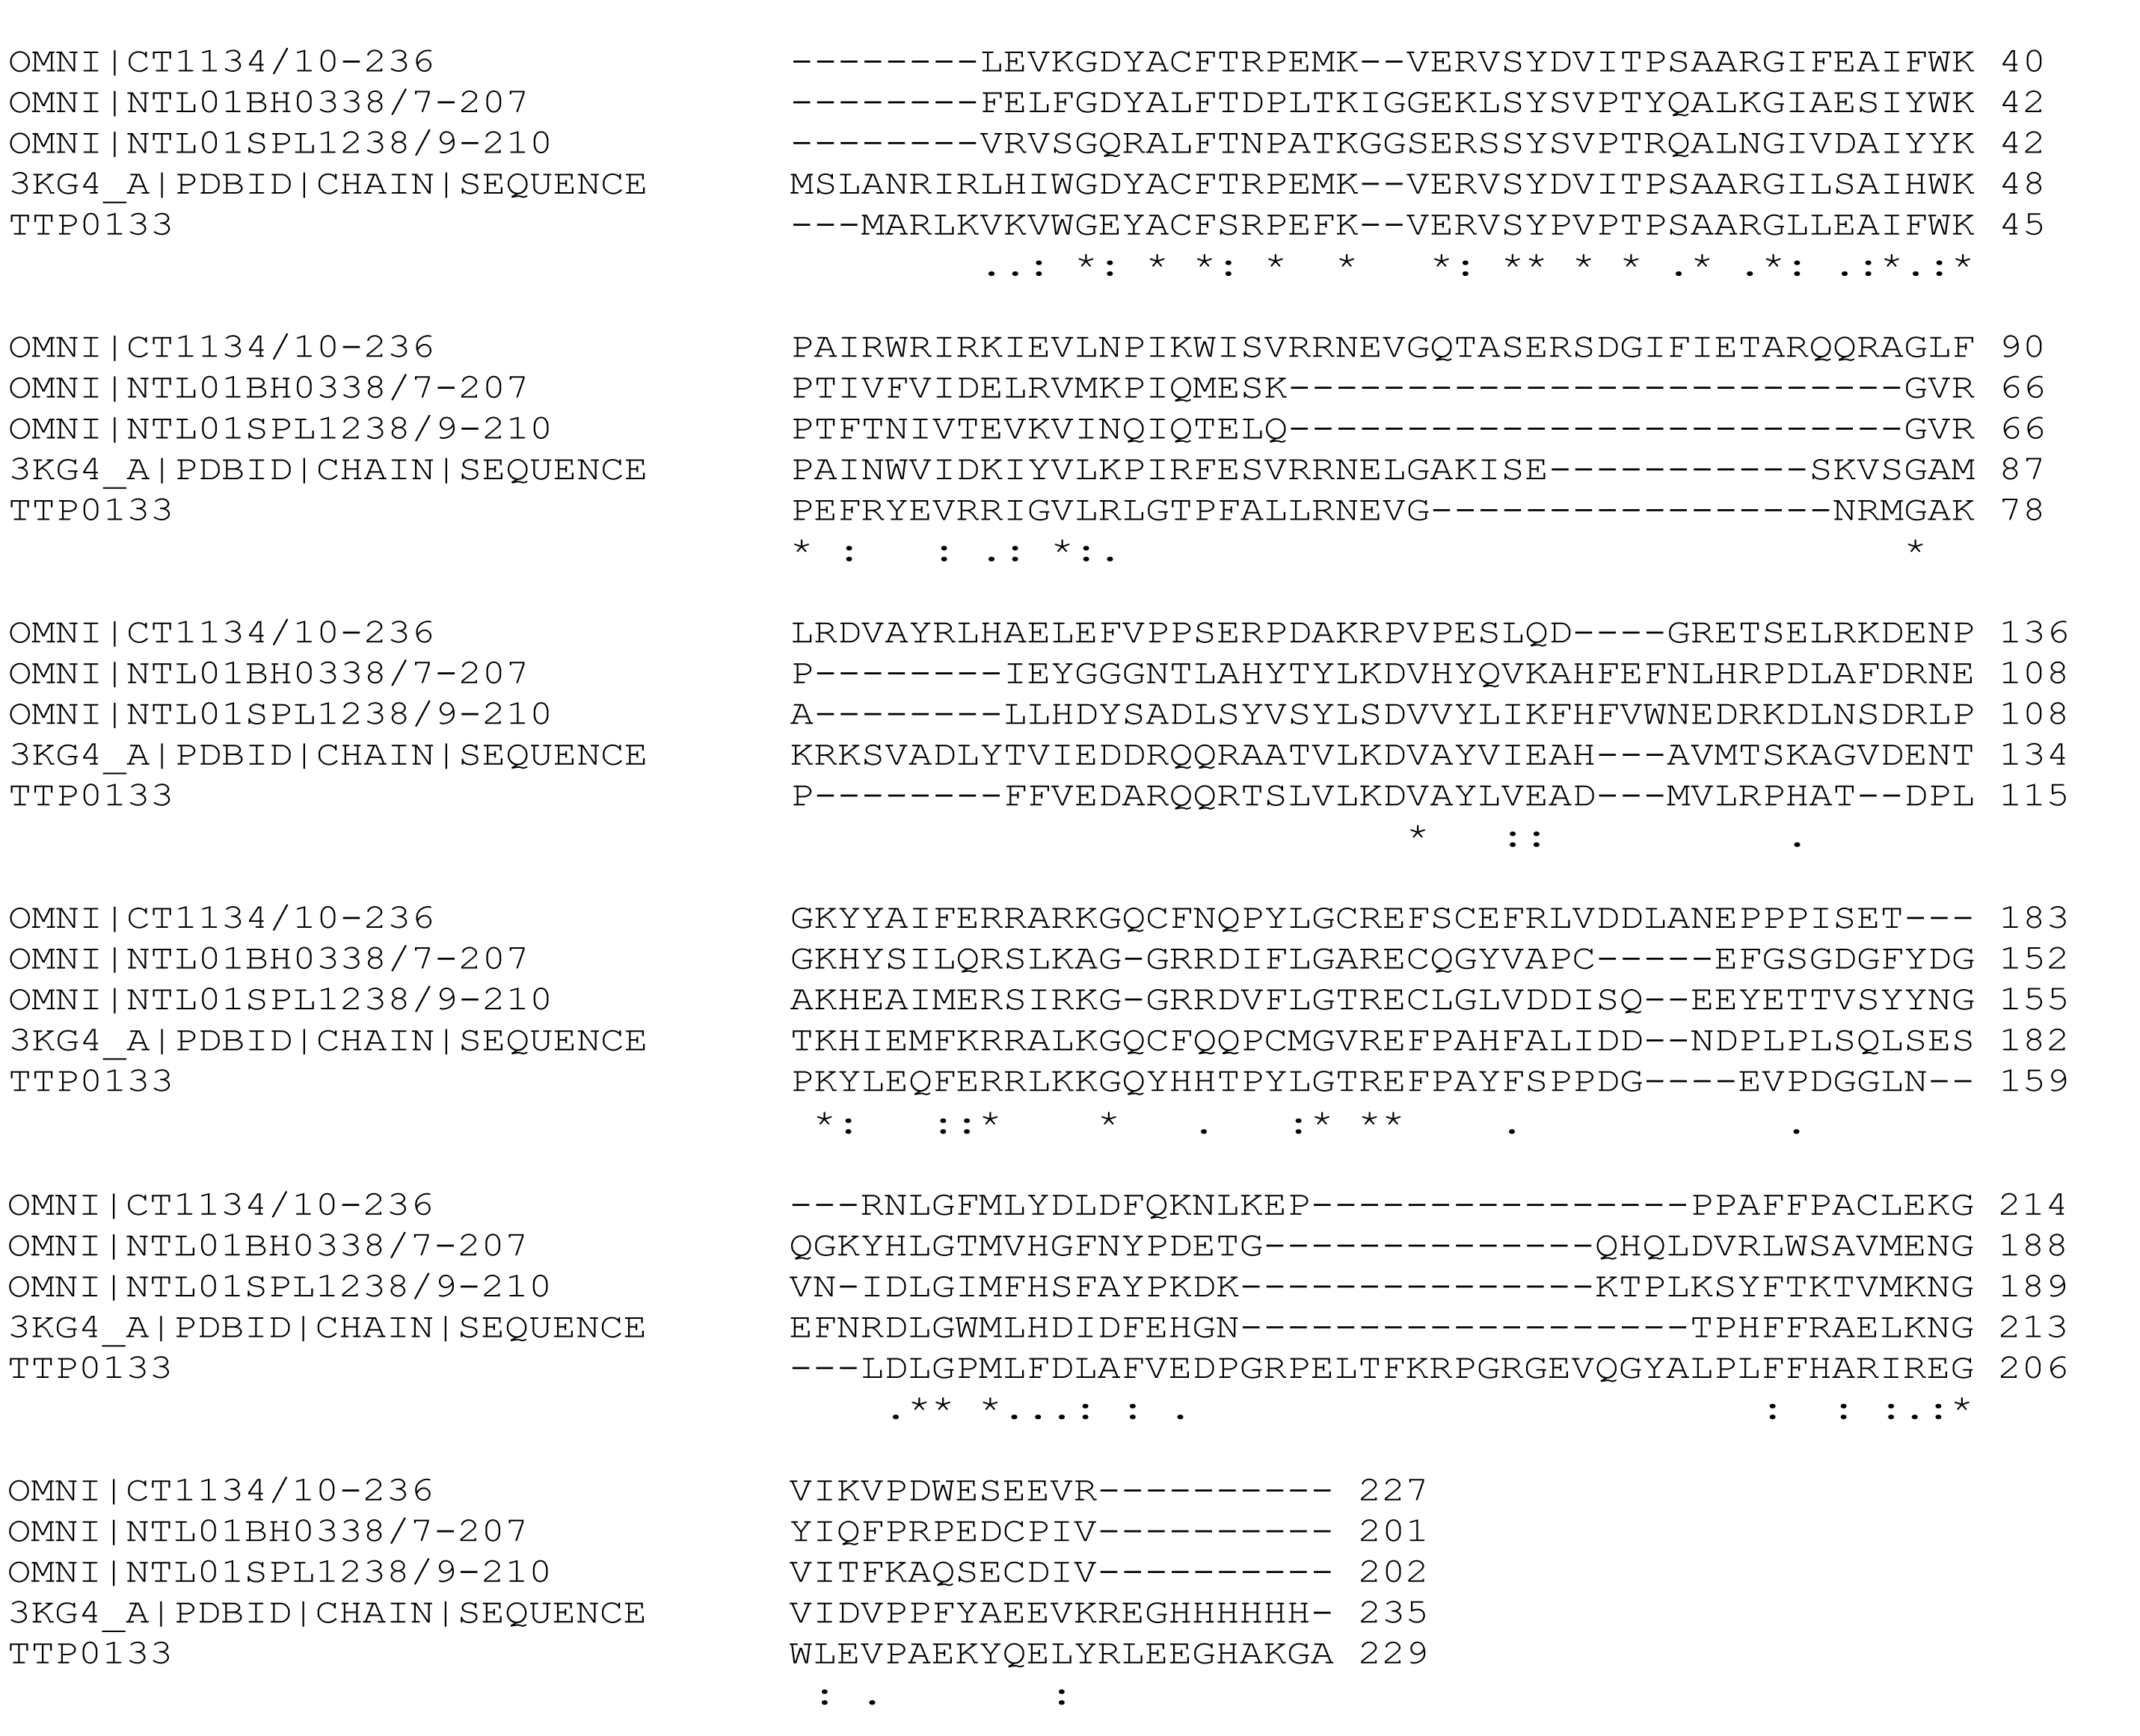
**

**Supplemental Figure 1.** **Alignment of Cas5d sequences.** Shown are the TIGRFAM (http//www.jcvi.org/cgi-bin/tigrfams/index.cgi) seed sequences aligned with *M. succiniciproducens* MS0988 (PDB: 3KG4) and *T. thermophilus* TTP0133. Also indicated are sequence identity (*), conservation (:), and partial conservation (.).
