# Supplementary material
Source: HighWire-hosted journal article supplement (doi:10.1101/rna.033100.112)
Supplement: SFig2.docx [file SFig2.docx]

**
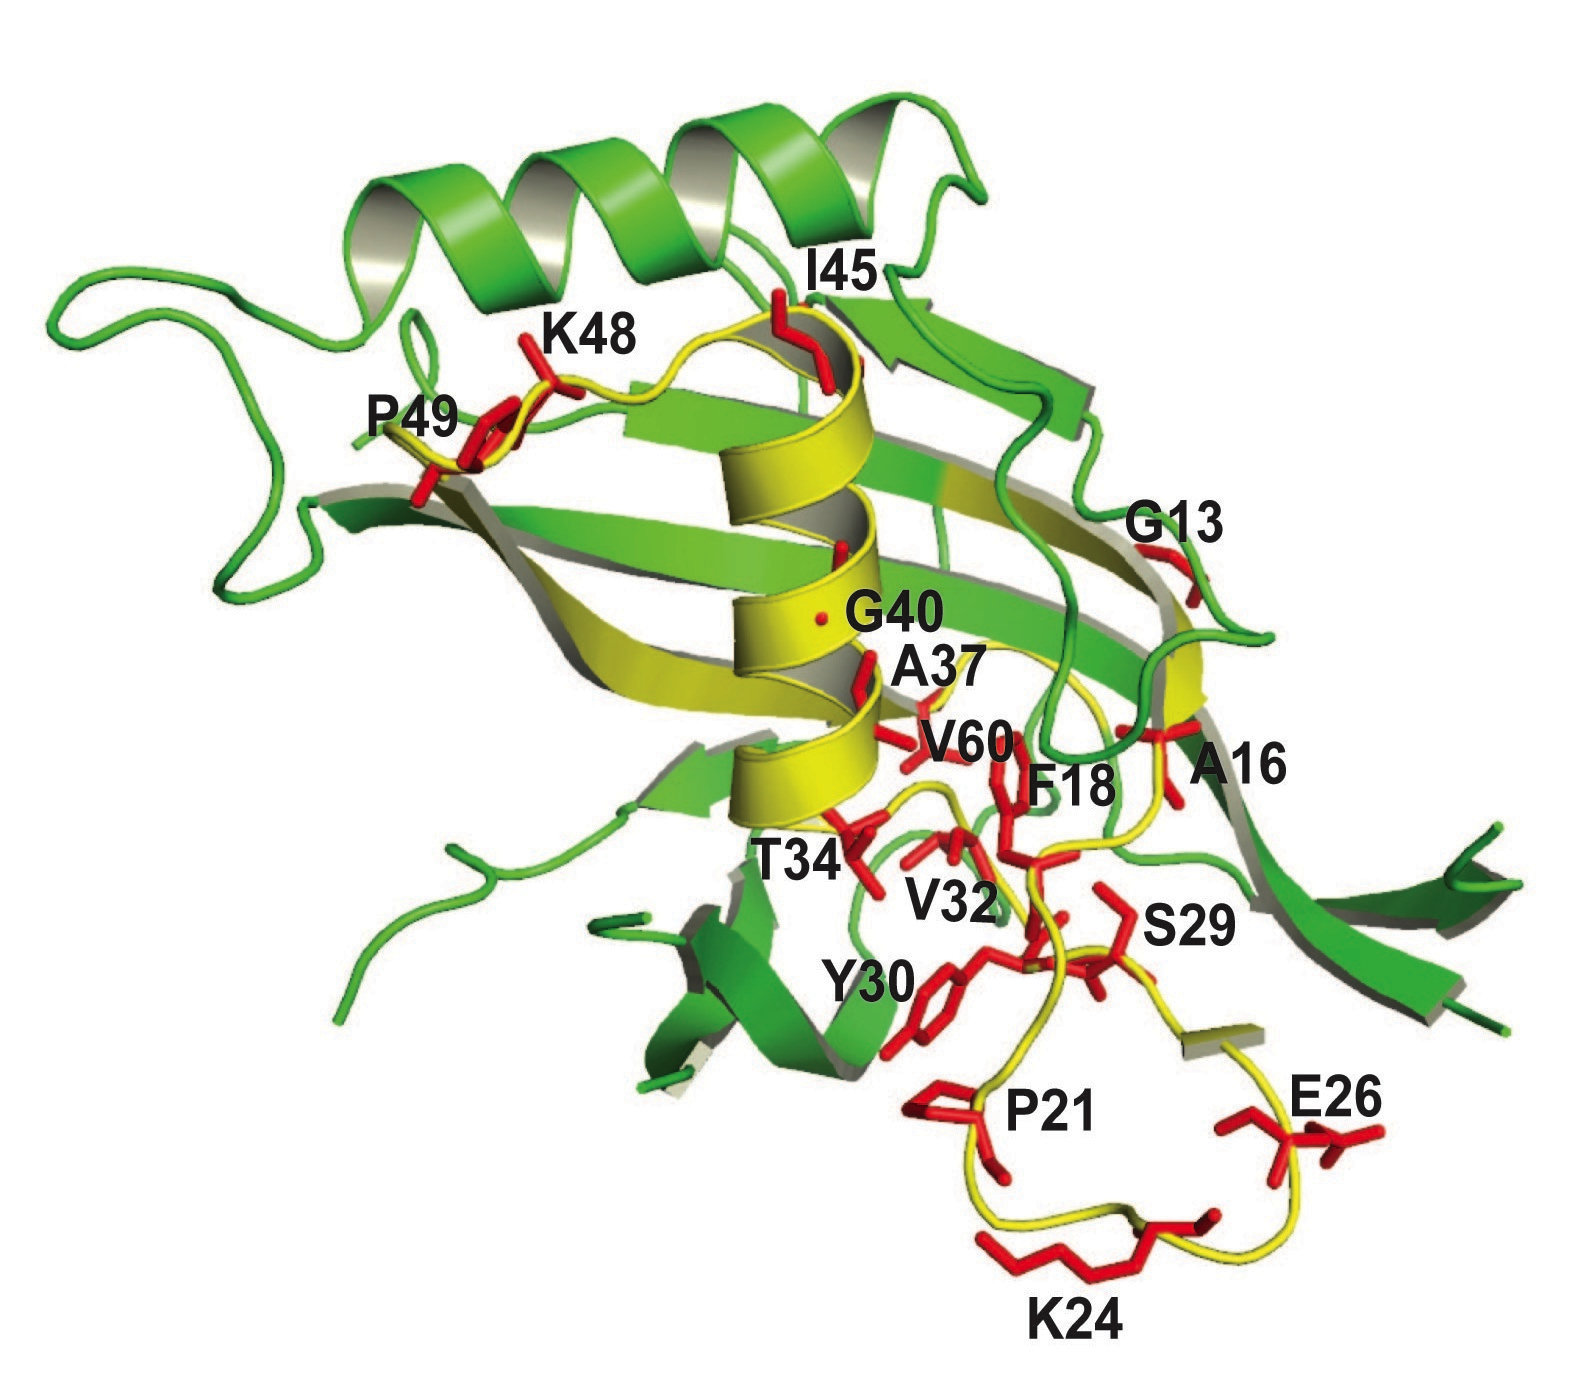
**

**Supplemental Figure 2. Structural context of Cas5 N-terminal domain.** The Cas5 family was originally partly defined on the basis of a conserved N-terminal sequence shown on the MS0988 X-ray structure in yellow. Side-chains of absolutely conserved residues are indicated in red.
